# Supplementary material for: UV Radiation and Protein Hydrolysates in Bio-Based Films: Impacts on Properties and Italian Salami Preservation
Source: MDPI journal article supplement (doi:10.3390/antiox13050517), 2024-04-26
Supplement: s1 [file s1]

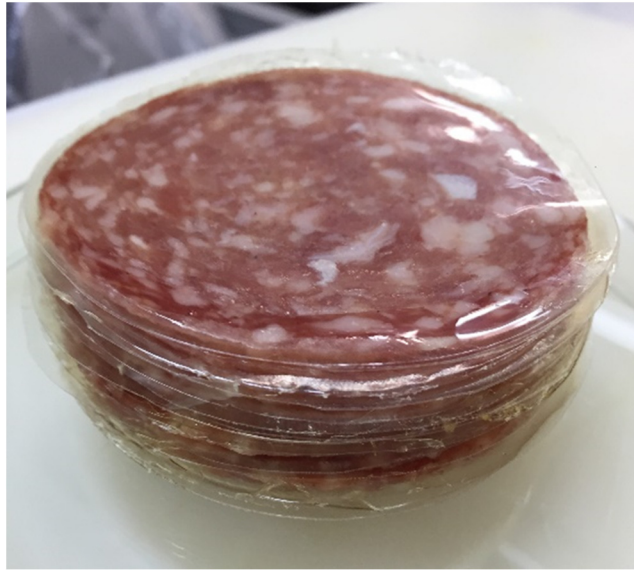

**Figure S1.** Lipid oxidation assay of sliced Italian salami containing films.

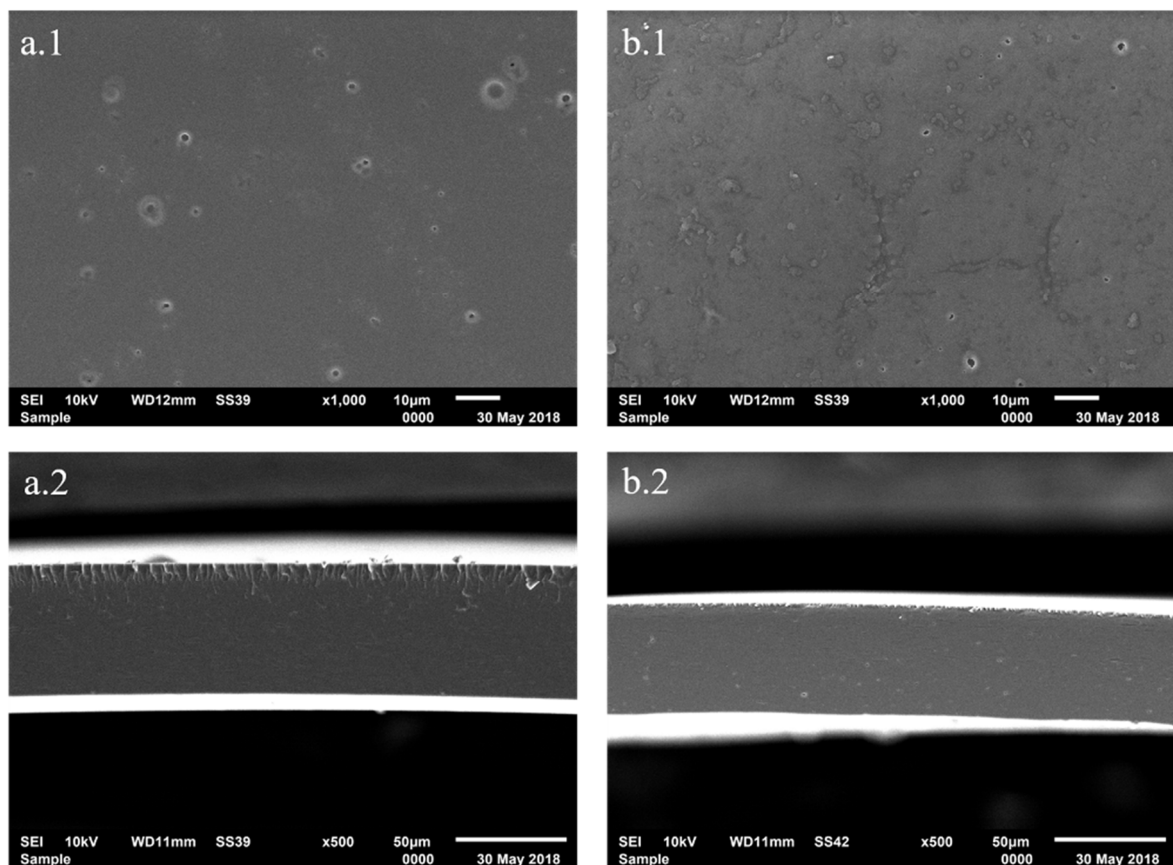

**Figure S2.** Effects of UV-light treatment on surface morphology (1) and cross-section area (2) of starch/protein films: a) control film and b) UV-treated film (1 min) coated with protein hydrolysates.

### Determination of protein hydrolysates amino acid composition

The amino acid composition of proteins hydrolysate was determined similar to Alemán et al. [1] with modifications. Briefly, the protein hydrolysates were dissolved in distilled water (5 mg/mL). An aliquot of 20 mL was dried and hydrolyzed in vacuum-sealed glass tubes at 110 °C for 24 h at constant boiling with 6 N HCl, containing 0.1% phenol. Then, protein hydrolysates were vacuum-dried again, dissolved in application buffer and injected into a Biochrom 20 amino acid analyzer (Pharmacia). Norleucine (Sigma-Aldrich, United States) was used as internal standard.

| Film               | $T_g$ (°C) | $T_m$ (°C) | $\Delta H$ (J/g) |
|--------------------|------------|------------|------------------|
| Control            | 53.31      | 85.71      | 146.27           |
| UV-treated (1 min) | 46.18      | 63.26      | 105.87           |

**Table S1.** DSC characterization of control and UV-radiated films coated with protein hydrolysates;  $T_g$ : Glass transition temperature;  $T_m$ : Melting temperature;  $\Delta H$ : Enthalpy.

| Amino acids         | Composition (mg/g protein) |
|---------------------|----------------------------|
| Alanine (Ala)       | 58.40 $\pm$ 0.04           |
| Arginine (Arg)      | 61.01 $\pm$ 0.46           |
| Aspartic acid (Asp) | 136.93 $\pm$ 0.38          |
| Cysteine (Cys)      | 4.16 $\pm$ 0.00            |
| Glutamic acid (Glu) | 188.60 $\pm$ 1.3           |
| Glycine (Gly)       | 35.87 $\pm$ 0.28           |
| Histidine (His)     | 24.66 $\pm$ 0.14           |
| Isoleucine (Ile)    | 31.00 $\pm$ 0.09           |
| Leucine (Leu)       | 83.96 $\pm$ 0.19           |
| Lysine (Lys)        | 96.07 $\pm$ 0.36           |
| Methionine (Met)    | 41.68 $\pm$ 0.48           |
| Phenylalanine (Phe) | 38.67 $\pm$ 0.01           |
| Proline (Pro)       | 33.37 $\pm$ 0.46           |
| Serine (Ser)        | 46.04 $\pm$ 0.40           |
| Threonine (Thr)     | 45.38 $\pm$ 0.62           |

|                |               |
|----------------|---------------|
| Tyrosine (Tyr) | 38.32 ± 0.11  |
| Valine (Val)   | 35.87 ± 0.02  |
| HAA            | 365.44 ± 0.34 |
| AAA            | 77.00 ± 0.11  |
| NCAA           | 325.53 ± 1.75 |
| PCAA           | 181.74 ± 0.68 |
| EAA            | 390.23 ± 0.28 |

---

**Table S2.** Amino acid composition of protein hydrolysates. HAA: hydrophobic amino acids (alanine, valine, isoleucine, leucine, tyrosine, phenylalanine, proline, methionine, and cysteine); AAA: aromatic amino acids (phenylalanine, tryptophan and tyrosine); NCAA: negatively charged amino acids (aspartic acid, glutamic acid); PCAA: positively charged amino acids (arginine, histidine, lysine); EEA: essential amino acids (phenylalanine, valine, threonine, isoleucine, methionine, histidine, leucine and lysine).

#### Reference

1. Alemán, A.; Pérez-Santín, E.; Bordenave-Juchereau, S.; Arnaudín, I.; Gómez-Guillén, M.C.; Montero, P. Squid Gelatin Hydrolysates with Antihypertensive, Anticancer and Antioxidant Activity. *Food Res. Int.* **2011**, *44*, 1044–1051, doi:10.1016/j.foodres.2011.03.010.
